# Supplementary material for: Crystal Structure of SARS-CoV-2 Main Protease in Complex with the Non-Covalent Inhibitor ML188
Source: PubMed Central journal article supplement (PMC7911568; doi:10.3390/v13020174), 2021-01-25
Supplement: viruses-13-00174-s001.pdf [file viruses-13-00174-s001.pdf]

## Supplementary Material

### Crystal Structure of SARS-CoV-2 Main Protease in Complex with the Non-Covalent Inhibitor ML188

*Gordon J. Lockbaum, Archie C. Reyes, Jeong Min Lee, Ronak Tilvawala, Ellen A. Nalivaika, Akbar*

*Ali, Nese Kurt Yilmaz, Paul R. Thompson, Celia A. Schiffer\**

Department of Biochemistry and Molecular Pharmacology, University of Massachusetts Medical  
School, Worcester, Massachusetts 01605, United States

\*Corresponding author. Email: [Celia.Schiffer@umassmed.edu](mailto:Celia.Schiffer@umassmed.edu)

## Supplementary Materials

Figure S1: Sequence alignment of SARS2-M<sup>pro</sup> and SARS1-M<sup>pro</sup>. Table S1: X-ray data collection and crystallographic refinement statistics. Figure S2: Comparison of crystallographic symmetry mates. Figure S3: C-alpha distance differences between SARS2-M<sup>pro</sup> ML188 complex and SARS1-M<sup>pro</sup> ML188 complex. Figure S4: Protease-Inhibitor vdW differences.

|       |     |                                                                                      |                                                                    |     |
|-------|-----|--------------------------------------------------------------------------------------|--------------------------------------------------------------------|-----|
| SARS1 | 1   | SGFRKMAFPSGKVEGCMVQVTCGTTTLNGLWLD                                                    | <b>T</b> VYVYCPRHVICT <b>A</b> EDML                                | 50  |
|       |     |                                                                                      | :                                                                  |     |
| SARS2 | 1   | SGFRKMAFPSGKVEGCMVQVTCGTTTLNGLWLD                                                    | <b>V</b> VYVYCPRHVICT <b>S</b> EDML                                | 50  |
|       |     |                                                                                      | :                                                                  |     |
| SARS1 | 51  | NPNYEDLLIRKSNH <b>S</b> FLVQAGNVQLRVIGHSMQN <b>C</b> L <b>L</b> R                    | LKVD <b>T</b> S <b>N</b> PKTPK                                     | 100 |
|       |     |                                                                                      | :                                                                  |     |
| SARS2 | 51  | NPNYEDLLIRKSNH <b>N</b> FLVQAGNVQLRVIGHSMQN <b>C</b> <b>V</b> <b>L</b> <b>K</b>      | LKVD <b>T</b> <b>A</b> NPKTPK                                      | 100 |
|       |     |                                                                                      | :                                                                  |     |
| SARS1 | 101 | YKQVRIQPGQTFSVLACVNGSPSGVYQCAMRPN <b>H</b>                                           | TIKGSFLNGSCGSVGF                                                   | 150 |
|       |     |                                                                                      | :                                                                  |     |
| SARS2 | 101 | YKQVRIQPGQTFSVLACVNGSPSGVYQCAMRPN <b>F</b>                                           | TIKGSFLNGSCGSVGF                                                   | 150 |
|       |     |                                                                                      | :                                                                  |     |
| SARS1 | 151 | NIDYDCVSFCYMHHMELPTGVHAGTDLE <b>G</b> <b>K</b> FYGPVDRQTAQAAGD <b>T</b>              | T <b>I</b>                                                         | 200 |
|       |     |                                                                                      | :                                                                  |     |
| SARS2 | 151 | NIDYDCVSFCYMHHMELPTGVHAGTDLE <b>G</b> <b>N</b> FYGPVDRQTAQAAGD <b>T</b>              | T <b>I</b>                                                         | 200 |
|       |     |                                                                                      | :                                                                  |     |
| SARS1 | 201 | <b>T</b> LNVLAWLYAAVINGDRWFLNRFTTTLNDFNLVAMKYN <b>E</b> PL <b>T</b>                  | QDHVDIL                                                            | 250 |
|       |     |                                                                                      | :                                                                  |     |
| SARS2 | 201 | <b>T</b> <b>V</b> NVLAWLYAAVINGDRWFLNRFTTTLNDFNLVAMKYN <b>E</b> PL <b>T</b>          | QDHVDIL                                                            | 250 |
|       |     |                                                                                      | :                                                                  |     |
| SARS1 | 251 | GPLSAQTGIAVLD <b>M</b> <b>C</b> <b>A</b> <b>A</b> LKELLQNGMNGRTILG <b>S</b> <b>T</b> | <b>I</b> LEDEF <b>T</b> PF <b>D</b> V <b>V</b> R <b>Q</b> <b>C</b> | 300 |
|       |     |                                                                                      | :                                                                  |     |
| SARS2 | 251 | GPLSAQTGIAVLD <b>M</b> <b>C</b> <b>A</b> <b>S</b> LKELLQNGMNGRTILG <b>S</b> <b>A</b> | <b>L</b> LEDEF <b>T</b> PF <b>D</b> V <b>V</b> R <b>Q</b> <b>C</b> | 300 |
|       |     |                                                                                      | :                                                                  |     |
| SARS1 | 301 | SGVTFQ                                                                               | 306                                                                |     |
|       |     |                                                                                      |                                                                    |     |
| SARS2 | 301 | SGVTFQ                                                                               | 306                                                                |     |

**Figure S1.** Sequence alignment of SARS2-M<sup>pro</sup> vs SARS1-M<sup>pro</sup>. Differences include: T35V, A46S, S65N, L86V, R88K, S94A, H134F, K180N, L202V, A267S, T285A, and I286L.

**Table S1.** X-ray data collection and crystallographic refinement statistics. Values in parentheses are for the highest resolution shell.

| <b>SARS2-M<sup>pro</sup>-ML188</b> |                              |
|------------------------------------|------------------------------|
| PDB ID                             | 7L0D                         |
| <b>Data Collection</b>             |                              |
| Space group                        | C121                         |
| $\alpha, b, c$ (Å)                 | 113.2, 52.7, 46.1            |
| $\alpha, \beta, \gamma$ (°)        | 90, 102.8, 90                |
| Resolution (Å)                     | 30.1 - 2.39<br>(2.47 - 2.39) |
| Unique Reflections                 | 9338 (886)                   |
| Total Reflections                  | 28452 (2586)                 |
| Redundancy                         | 3.0 (2.9)                    |
| Completeness (%)                   | 87.9 (84.6)                  |
| Average $I/\sigma$                 | 12.3 (3.4)                   |
| $R_{merge}$ <sup>a</sup>           | 0.069 (0.313)                |
| $R_{pim}$                          | 0.045 (0.210)                |
| CC 1/2                             | 0.995 (0.862)                |
| <b>Refinement</b>                  |                              |
| $R_{factor}$ (%) <sup>c</sup>      | 20.1                         |
| $R_{free}$ (%) <sup>d</sup>        | 26.1                         |
| RMSD <sup>b</sup> in:              |                              |
| Bond lengths (Å)                   | 0.003                        |
| Bond angles (°)                    | 0.550                        |
| Ramachandrans:                     |                              |
| Favored (%)                        | 97.36                        |
| Allowed (%)                        | 2.31                         |
| Outliers (%)                       | 0.33                         |
| B-factors:                         |                              |
| Average                            | 35.66                        |
| Macromolecules                     | 35.55                        |
| Ligands                            | 36.61                        |
| Solvent                            | 37.77                        |

<sup>a</sup> $R_{sym} = \sum |I - \langle I \rangle| / \sum I$ , where  $I$  = observed intensity,  $\langle I \rangle$  = average intensity over symmetry equivalent

<sup>b</sup>RMSD, root mean square deviation.

<sup>c</sup> $R_{factor} = \sum ||F_o| - |F_c|| / \sum |F_o|$ .

<sup>d</sup> $R_{free}$  was calculated from 5% of reflections, chosen randomly, which were omitted from the refinement process.

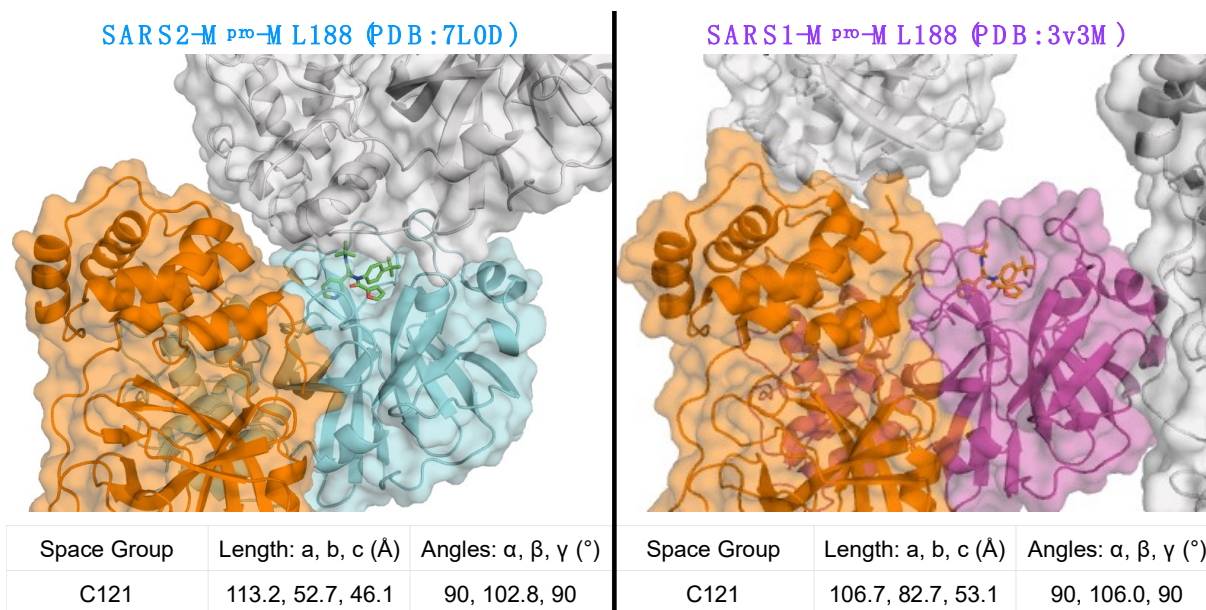

**Figure S2.** Comparison of crystallographic symmetry mates. SARS2-M<sup>PRO</sup>-ML188 complex (cyan) and SARS1-M<sup>PRO</sup>-ML188 complex (magenta) with natural dimer (orange) and relevant crystallographic symmetry mates within 4 Å (grey)

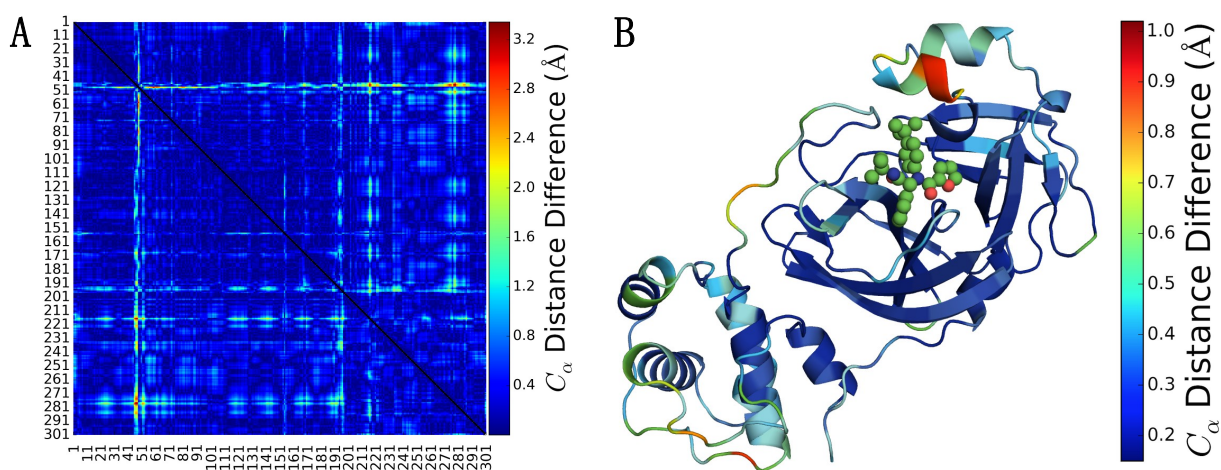

**Figure S3.** A) C-alpha distance differences between SARS2-M<sup>PRO</sup>-ML188 and SARS1-M<sup>PRO</sup>-ML188. Residues 301-306 were excluded because the differences at those residues were large and overshadowed the analysis. B) Average C-alpha distance differences plotted onto structure, shown as cartoon, with inhibitor ML188 shown as green spheres.

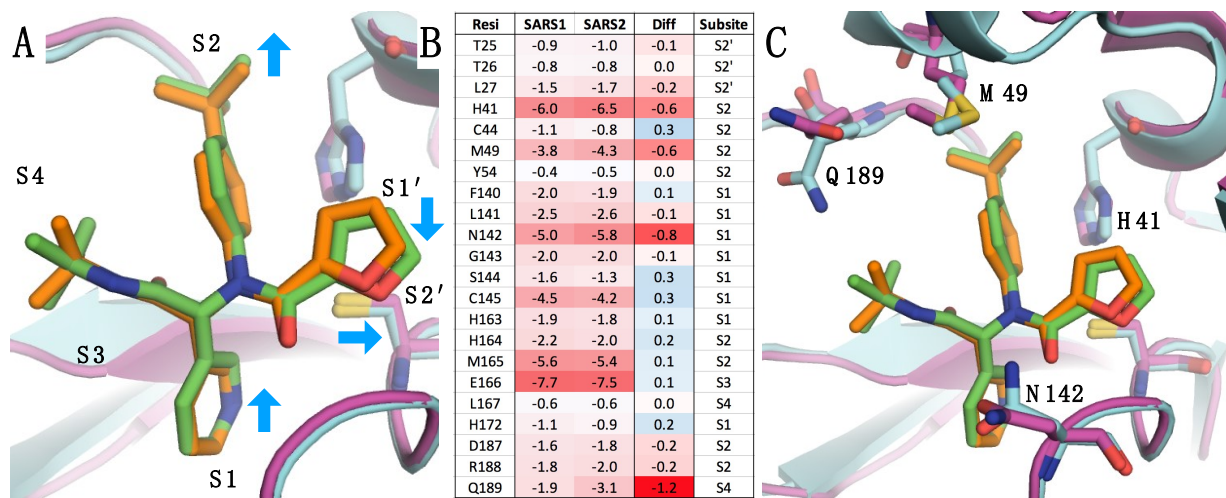

**Figure S4.** A) Overall shifts in Inhibitor binding between ML188 and SARS2-M<sup>pro</sup> and SARS1-M<sup>pro</sup>, emphasized with blue arrows. B) Per-residue protein-inhibitor vdW contacts between ML188 and SARS2-M<sup>pro</sup> and SARS1-M<sup>pro</sup>. In the “Diff” column, **Red** indicates ML188 makes more contacts in SARS2 than SARS1, and **Blue** indicates less contacts. C) Residues that showed the largest differences in protein-inhibitor vdW contacts are shown as sticks.
